# Supplementary material for: Social and Built Environments Related to Cognitive Function of Older Adults: A Multi-Level Analysis Study in Taiwan
Source: Int J Environ Res Public Health. 2021 Mar 10;18(6):2820. doi: 10.3390/ijerph18062820 (PMC7998392; doi:10.3390/ijerph18062820)
Supplement: Supplementary file 1 [file ijerph-18-02820-s001.pdf]

**Supplement Table S1.** Factor analysis of food-intake frequency

| Variables<br>(food items) | Factors (Food Categories)                           |                               |                                        |                     |                                |                               |                   |                                                |                                                      |                      |                      |                               |                              |                                                          |              |                      |
|---------------------------|-----------------------------------------------------|-------------------------------|----------------------------------------|---------------------|--------------------------------|-------------------------------|-------------------|------------------------------------------------|------------------------------------------------------|----------------------|----------------------|-------------------------------|------------------------------|----------------------------------------------------------|--------------|----------------------|
|                           | 1<br>White<br>meat<br>and<br>reprod<br>uced<br>meat | 2<br>Rice,<br>bread,<br>dairy | 3<br>Melon,<br>, bean,<br>mush<br>room | 4<br>Organ<br>blood | 5<br>Cookie,<br>cake,<br>candy | 6<br>Juice,<br>sweet<br>drink | 7<br>Ice<br>cream | 8<br>Light<br>vegetab<br>les,<br>root<br>plant | 9<br>Reprod<br>uced<br>seafood<br>ferment<br>ed bean | 10<br>Vegeta<br>bles | 11<br>Jam,<br>cheese | 12<br>Fruit<br>and<br>pickles | 13<br>Fish<br>eggs,<br>fried | 14<br>Fermen<br>ted<br>fruit/<br>vegetab<br>les,<br>eggs | 15<br>drinks | 16<br>Milk<br>powder |
| Fish                      | <b>.706</b>                                         | .023                          | -.125                                  | .025                | -.146                          | .049                          | -.058             | .135                                           | .115                                                 | -.093                | -.083                | .143                          | .021                         | -.020                                                    | .064         | .077                 |
| Poultry                   | <b>.663</b>                                         | .017                          | .037                                   | .213                | .035                           | .027                          | .067              | .062                                           | .001                                                 | -.043                | -.035                | .077                          | -.092                        | -.078                                                    | .090         | .106                 |
| Poultry-lean              | <b>.615</b>                                         | .057                          | -.080                                  | .128                | .010                           | .042                          | .006              | .046                                           | -.198                                                | .068                 | -.094                | .034                          | -.209                        | .062                                                     | .053         | .197                 |
| Processed see<br>food     | <b>.556</b>                                         | -.009                         | .188                                   | .050                | .177                           | -.082                         | .023              | -.010                                          | -.053                                                | .067                 | .117                 | -.069                         | .019                         | .055                                                     | -.177        | -.123                |
| Shell fish                | <b>.553</b>                                         | .091                          | .316                                   | -.016               | .012                           | .023                          | -.010             | -.089                                          | .152                                                 | .030                 | .058                 | -.117                         | .244                         | -.031                                                    | -.040        | -.117                |
| Ocean fish                | <b>.547</b>                                         | .174                          | .046                                   | -.054               | -.121                          | .046                          | .022              | .223                                           | .130                                                 | -.109                | -.061                | .113                          | .208                         | .066                                                     | .076         | -.010                |
| Other sea<br>food         | <b>.537</b>                                         | .150                          | .199                                   | .116                | .078                           | -.007                         | .039              | -.134                                          | .093                                                 | .006                 | .098                 | -.037                         | .248                         | .008                                                     | .019         | -.196                |
| Processed<br>meat slurry  | <b>.513</b>                                         | -.147                         | .169                                   | .078                | .182                           | .006                          | .175              | -.064                                          | -.117                                                | .127                 | .036                 | -.118                         | .004                         | -.075                                                    | -.171        | -.030                |
| Processed fish            | <b>.446</b>                                         | .152                          | .207                                   | .062                | .015                           | -.073                         | -.181             | .032                                           | .326                                                 | .005                 | .152                 | -.079                         | .058                         | .071                                                     | .009         | .127                 |
| Processed<br>meat         | <b>.356</b>                                         | -.124                         | .028                                   | .144                | .259                           | .124                          | .205              | .180                                           | .200                                                 | .033                 | .117                 | .019                          | -.047                        | .124                                                     | -.106        | -.031                |
| Whole grain<br>rice       | -.028                                               | <b>.656</b>                   | .098                                   | -.008               | -.032                          | -.080                         | -.011             | .004                                           | -.082                                                | -.029                | -.092                | .055                          | .061                         | .005                                                     | -.028        | .004                 |
| Whole grain<br>bread      | .097                                                | <b>.642</b>                   | .001                                   | .003                | .052                           | .084                          | -.006             | -.067                                          | .102                                                 | .046                 | .084                 | -.001                         | -.134                        | -.030                                                    | .028         | .058                 |
| Yogurt                    | .079                                                | <b>.530</b>                   | .085                                   | .040                | -.089                          | .239                          | -.007             | -.045                                          | .050                                                 | .009                 | .162                 | -.198                         | -.133                        | -.034                                                    | -.096        | .113                 |
| Nuts                      | .016                                                | <b>.517</b>                   | .153                                   | .113                | .151                           | -.065                         | .101              | .023                                           | -.032                                                | .083                 | .085                 | .193                          | .148                         | .021                                                     | .048         | -.050                |

|                           |       |             |             |             |             |             |             |       |       |       |       |       |       |       |       |       |
|---------------------------|-------|-------------|-------------|-------------|-------------|-------------|-------------|-------|-------|-------|-------|-------|-------|-------|-------|-------|
| Healthy dried fruits      | .016  | <b>.471</b> | .132        | .110        | .189        | -.135       | -.015       | .159  | .089  | -.120 | .132  | -.017 | .124  | .160  | .091  | .030  |
| Soy milk                  | .119  | <b>.354</b> | .124        | .005        | .035        | .307        | .203        | -.034 | .060  | .081  | .045  | -.081 | .033  | -.242 | .073  | -.339 |
| Other soy bean products   | .011  | .140        | <b>.584</b> | .064        | .084        | -.022       | -.030       | .118  | .071  | .016  | .106  | -.065 | -.089 | -.072 | -.019 | -.117 |
| Melons                    | .154  | -.030       | <b>.572</b> | -.022       | -.145       | .121        | .105        | .033  | -.014 | .007  | -.011 | .105  | -.082 | .077  | .301  | .154  |
| Bamboo                    | .251  | .029        | <b>.509</b> | .089        | -.084       | -.024       | .134        | -.093 | .093  | .057  | .052  | .123  | -.015 | .165  | .082  | .152  |
| Sea plant                 | .115  | .343        | <b>.495</b> | .052        | .061        | .038        | .004        | .149  | .045  | .049  | -.026 | .011  | .105  | -.075 | -.039 | .067  |
| Pod                       | .125  | .231        | <b>.471</b> | .002        | -.037       | .045        | .031        | .209  | .049  | .064  | -.194 | -.058 | .025  | .191  | .157  | .031  |
| Fried bean                | -.027 | .008        | <b>.464</b> | .252        | .269        | .077        | .068        | -.032 | -.046 | -.091 | .092  | -.086 | -.011 | -.174 | -.180 | -.031 |
| Mushroom                  | .211  | .419        | <b>.430</b> | -.028       | .094        | .012        | .014        | .171  | -.027 | .112  | -.092 | .122  | .084  | .063  | -.077 | -.054 |
| Liver                     | .105  | .090        | .059        | <b>.683</b> | -.012       | .035        | -.068       | .049  | .043  | .025  | -.046 | -.125 | -.070 | .076  | -.015 | .044  |
| Other organ               | .162  | .090        | .057        | <b>.649</b> | .010        | .025        | .095        | -.008 | .031  | .039  | .052  | .100  | .059  | .097  | .103  | -.142 |
| Other poultry/animal part | .181  | -.011       | .012        | <b>.545</b> | .104        | -.004       | .123        | .034  | -.031 | -.002 | .202  | .130  | .102  | -.072 | .015  | .055  |
| blood                     | .170  | .038        | .192        | <b>.504</b> | -.002       | .070        | -.068       | -.067 | .202  | -.028 | -.176 | -.035 | .183  | -.081 | -.083 | .098  |
| Cookies                   | .048  | .073        | .154        | -.060       | <b>.627</b> | .017        | -.028       | -.056 | .069  | -.008 | .019  | .213  | .098  | -.074 | .077  | .220  |
| Candy                     | .026  | .108        | -.047       | .110        | <b>.612</b> | .190        | -.055       | .143  | .116  | -.018 | -.182 | .019  | .143  | .081  | .081  | -.075 |
| Cakes                     | .191  | .160        | .033        | .053        | <b>.539</b> | .042        | .132        | .111  | -.057 | -.006 | .177  | -.123 | -.145 | .157  | -.017 | -.011 |
| Sold juice                | -.054 | .002        | .053        | .057        | -.021       | <b>.734</b> | .032        | .054  | -.029 | -.041 | -.013 | .039  | .067  | .109  | .005  | .022  |
| Sweetened drink           | .095  | .027        | .026        | .119        | .219        | <b>.609</b> | .122        | -.068 | .173  | .081  | -.017 | -.020 | .065  | -.151 | .033  | -.103 |
| Sweetened milk            | .119  | .041        | .043        | -.084       | .126        | <b>.436</b> | -.140       | -.049 | -.089 | -.033 | .268  | -.058 | -.273 | .019  | -.066 | .039  |
| Ice bar                   | .090  | -.029       | .104        | .053        | -.014       | -.001       | <b>.687</b> | -.172 | .141  | .093  | .038  | .038  | -.083 | -.049 | .138  | -.110 |
| Ice cream                 | .071  | .172        | .036        | .045        | .031        | .057        | <b>.649</b> | .095  | -.020 | -.140 | -.083 | -.039 | .074  | .097  | -.162 | .142  |
| Pudding and deserts       | .075  | .086        | .212        | -.047       | .138        | .250        | <b>.332</b> | .000  | .297  | -.025 | .057  | -.074 | .069  | .060  | .044  | .170  |

|                    |       |       |       |       |       |       |       |             |             |             |             |              |             |              |             |             |
|--------------------|-------|-------|-------|-------|-------|-------|-------|-------------|-------------|-------------|-------------|--------------|-------------|--------------|-------------|-------------|
| Light vegetables   | .152  | -.002 | .129  | .062  | .063  | -.019 | -.058 | <b>.672</b> | .017        | .114        | -.012       | -.062        | -.015       | -.142        | .005        | -.059       |
| Root plants        | .160  | .174  | .299  | -.031 | .096  | .003  | -.005 | <b>.580</b> | .024        | .160        | -.020       | .101         | -.064       | -.009        | -.044       | .009        |
| Seafood product    | .168  | .017  | .060  | .095  | .046  | .037  | .177  | .038        | <b>.669</b> | .010        | .024        | .019         | -.017       | -.070        | -.136       | .069        |
| Fermented bean     | .129  | .086  | .282  | .157  | .100  | .031  | -.043 | .016        | <b>.432</b> | -.039       | .158        | .016         | -.006       | .270         | -.019       | -.102       |
| Vegetables         | -.025 | -.024 | -.011 | .042  | .000  | .084  | -.022 | .038        | .012        | <b>.810</b> | .061        | .002         | -.017       | .056         | .044        | .080        |
| Dark vegetables    | .085  | .115  | .185  | -.013 | -.022 | -.112 | -.014 | .221        | -.024       | <b>.639</b> | -.040       | .081         | .099        | -.016        | -.069       | -.027       |
| Jam                | .056  | .176  | .058  | .027  | -.028 | .030  | -.061 | -.083       | .133        | .063        | <b>.627</b> | .009         | .096        | -.028        | .033        | .004        |
| Cheese             | .078  | .380  | .017  | .117  | .088  | .074  | .169  | .168        | -.033       | -.058       | <b>.392</b> | -.140        | -.032       | .068         | .052        | .091        |
| Pure juice         | .127  | .158  | .075  | -.075 | -.043 | -.056 | .205  | .199        | .129        | .069        | .146        | <b>-.532</b> | .198        | .012         | .157        | .055        |
| Fruits             | .185  | .255  | .231  | -.089 | .070  | .004  | .109  | .036        | -.042       | .104        | -.106       | <b>.442</b>  | .096        | -.151        | -.011       | .052        |
| Salted vegetables  | .267  | .154  | -.023 | .050  | -.014 | -.153 | .034  | .130        | .123        | .153        | .153        | <b>.409</b>  | -.011       | .078         | .038        | .094        |
| Half-fat livestock | .313  | -.078 | -.048 | .179  | .067  | .084  | .112  | .177        | .172        | -.034       | .225        | <b>.324</b>  | .114        | -.044        | .260        | -.153       |
| Roe                | .175  | .064  | -.053 | .141  | .115  | .026  | -.037 | -.078       | .009        | .082        | .061        | -.051        | <b>.646</b> | .028         | .046        | .082        |
| Fried fast food    | .078  | .005  | .029  | .062  | -.022 | .243  | .189  | .192        | -.246       | -.092       | .300        | .044         | <b>.395</b> | .139         | -.227       | .230        |
| Preserves          | .120  | .160  | .090  | .003  | .288  | .024  | .132  | -.184       | .011        | .096        | -.029       | -.049        | .102        | <b>.547</b>  | -.011       | -.039       |
| Pickles            | .091  | -.062 | .267  | .229  | .048  | .073  | -.008 | .055        | .121        | .017        | .207        | .272         | -.060       | <b>.423</b>  | -.136       | -.094       |
| Eggs               | .282  | .115  | .146  | -.008 | .115  | .013  | .013  | .128        | .102        | .049        | .083        | .216         | -.042       | <b>-.378</b> | -.018       | .138        |
| Other fried food   | .127  | -.061 | .078  | .205  | .163  | .138  | .201  | .106        | -.080       | -.116       | .182        | .148         | .194        | <b>-.258</b> | -.137       | -.120       |
| Other drinks       | -.014 | .031  | .097  | .032  | .091  | -.005 | -.013 | -.027       | -.130       | -.011       | .028        | -.060        | .022        | -.026        | <b>.775</b> | .015        |
| Milk powder        | .096  | .147  | .085  | .010  | .083  | -.013 | .063  | -.058       | .067        | .081        | .045        | -.003        | .094        | -.119        | .030        | <b>.685</b> |

Note: Extraction Method: Principal Component Analysis. Rotation Method: Quartimax with Kaiser Normalization. Explained variance=49.64%

**Supplement Table S2.** Cluster analysis of dietary patterns

| Variables                                      | Dietary Patterns                                               |                                                               |                                                                                   |                                                              |
|------------------------------------------------|----------------------------------------------------------------|---------------------------------------------------------------|-----------------------------------------------------------------------------------|--------------------------------------------------------------|
|                                                | Cluster 1:<br>Low protein<br>and high<br>vegetables<br>(n=964) | Cluster 2:<br>High protein<br>and high<br>calories<br>(n=244) | Cluster 3:<br>Low<br>vegetable/frit<br>s and high<br>cookies/cake<br>s<br>(n=117) | Cluster #:<br>High protein<br>and low<br>vegetables<br>(n=3) |
| White meat (fish, poultry) and reproduced meat | -.13294                                                        | .51124                                                        | .01569                                                                            | .52568                                                       |
| Rice, bread, dairy                             | -.12355                                                        | .49389                                                        | -.02468                                                                           | .49380                                                       |
| Melon, bamboo, bean, mushroom                  | -.08804                                                        | .26633                                                        | .16378                                                                            | .24020                                                       |
| Organ, blood                                   | -.15367                                                        | .59324                                                        | .05159                                                                            | -.88420                                                      |
| Cookie, cake, candy                            | -.07168                                                        | .13830                                                        | .30234                                                                            | -.00644                                                      |
| Juice, sweetened drink                         | -.09661                                                        | .38225                                                        | .04416                                                                            | -1.76830                                                     |
| Ice cream                                      | -.00964                                                        | .08589                                                        | -.11147                                                                           | .45978                                                       |
| Light vegetable, root plants                   | .02562                                                         | -.01741                                                       | -.15448                                                                           | -.79342                                                      |
| Reproduced seafood, fermented bean             | .06238                                                         | -.05084                                                       | -.40140                                                                           | -.25660                                                      |
| vegetables                                     | .07337                                                         | -.04057                                                       | -.08332                                                                           | -17.02641                                                    |
| Jam, cheese                                    | -.28324                                                        | 1.10269                                                       | .06684                                                                            | -1.27851                                                     |
| Fruit, sauce vegetable                         | .05060                                                         | -.12623                                                       | -.15260                                                                           | -.04167                                                      |
| Fish egg, fried food                           | -.13589                                                        | .49137                                                        | .08589                                                                            | .35043                                                       |
| Fermented fruit/vegetables, eggs               | .02923                                                         | -.06641                                                       | -.07218                                                                           | -1.17607                                                     |
| drinks                                         | -.18860                                                        | -.40504                                                       | 2.42245                                                                           | -.92918                                                      |
| Milk powder                                    | -.06164                                                        | .25868                                                        | .01171                                                                            | -1.69001                                                     |

Note: Analysis by cluster analysis. #The cases in this cluster were too few; the cluster was combined to Cluster 2.

**Supplement Table S3.** Cognitive function associated with city- and individual-level for older adults in Taiwan 2013-2016 by mixed effect model (categorical population density)

| Variable                                                       | Model 5a        | Model 5b          |
|----------------------------------------------------------------|-----------------|-------------------|
| <b>Fixed Effects: Individual-level indicators</b>              |                 |                   |
| Intercept                                                      | 7.730 (8.901)   | 8.344 (5.672)     |
| Age 65-69                                                      |                 | 1.862 (0.354)***  |
| Age 70-74                                                      |                 | 1.676 (0.358)***  |
| Age 75-79                                                      |                 | 1.483 (0.370)***  |
| Sex (Male)                                                     |                 | 0.370 (0.309)     |
| Marital status (no spouse)                                     |                 | -0.455 (0.262)    |
| Education (ordinal 1-5)                                        |                 | 1.296 (0.105)***  |
| Financial satisfaction                                         |                 | 0.333 (0.157)*    |
| Smoking (non-smoker)                                           |                 | -0.262 (0.469)    |
| Smoking (Ex-smoker)                                            |                 | 0.152 (0.466)     |
| Drinking alcohol (Non-drinker)                                 |                 | 0.179 (0.377)     |
| Drinking alcohol (Social drinker)                              |                 | 0.137 (0.362)     |
| Dietary pattern (High protein and high calories)               |                 | -0.231 (0.295)    |
| Dietary pattern (low vegetable/fruits and high cookies/drinks) |                 | 0.514 (0.393)     |
| Physical activity (low)                                        |                 | -0.228 (0.496)    |
| Self-rated health                                              |                 | -0.127 (0.063)*   |
| Disease numbers                                                |                 | 0.145 (0.061)*    |
| Physical function                                              |                 | 0.200 (0.031)***  |
| Negative emotion                                               |                 | 0.002 (0.033)     |
| Positive emotion                                               |                 | 0.053 (0.032)     |
| <b>Fixed Effects: City-level indicators</b>                    |                 |                   |
| Population density (low)                                       | -0.137 (0.680)  | -0.182 (0.419)    |
| Population density (medium)                                    | 0.731 (0.634)   | 0.473 (0.394)     |
| Low income percent                                             | -0.491 (0.210)* | -0.458 (0.130)*** |
| Average household income Gini                                  | -2.236 (11.617) | 0.904 (7.296)     |
| Safety in the community                                        | 0.176 (0.081)   | 0.064 (0.051)     |
| Barrier-free sidewalk                                          | 2.107 (1.037)   | 1.117 (0.641)     |
| Elderly abuse rate                                             | 4.060 (4.807)   | 1.984 (3.000)     |
| <b>Random effect</b>                                           |                 |                   |
| Residual                                                       | 19.539 (0.851)  | 13.084 (0.571)    |
| Intercept (city)                                               | 0.290 (0.269)   | ---               |
| <b>Goodness of fit</b>                                         |                 |                   |
|                                                                | -2 RLL=6242.853 | -2RLL=5822.533    |
|                                                                | AIC=6246.853    | AIC=5826.533      |
|                                                                | BIC=6256.798    | BIC=5836.443      |

Note: -2RLL: -2 restricted log likelihood. AIC: Akaike's Information Criterion, BIC: Schwarz's Bayesian Criterion. The reference groups: age (age 80+), sex (female), marital status (having spouse), smoking (current smoker), drinking alcohol (frequent drinker), dietary pattern (low protein and high vegetables), physical activity (medium), and city population density (high). Other variables were continuous or ordinal. #Population density=persons per square kilometres/100, \*p<0.05, \*\*p<0.001, \*\*\*p<0.001.
